# Supplementary material
Source: HighWire-hosted journal article supplement (https://bmjopen.bmj.com/content/12/4/e054690)
Supplement: inline-supplementary-material-1 [file inline-supplementary-material-1.pdf]

## Appendix S1: Global Children's NCDs Collaborative

### Steering committee:

Soham Bandyopadhyay [UK], Noel Peter [UK] (Asia Lead), Kokila Lakhoo [UK], Simone de Campos Vieira Abib [Brazil] (South America Lead), Hafeez Abdelhafeez [Sudan] (Africa and Middle East Lead), Shaun Wilson [UK] (Australasia Lead), Max Pachel [UK] (Europe and North America Lead), Benjamin Martin [UK] (Europe Lead), Sonal Nagras [Australia] (Australasia Lead), and Mihir Sheth [India]

### Operational committee:

Catherine Dominic [UK], Suraj Gandhi [UK], Divya Parwani [India], Rhea Raj [UAE], Diella Munezero [Burundi], Rohini Dutta [India], Nsimire Mulanga Roseline [DRC], Kellie McClafferty [UK], Armin Nazari [UK], Smrithi Sriram [UK], Sai Pillariseti [UK], King-David Nweze [UK], Aishwarya Ashwinee [Grenada], Gul Kalra [India], Poorvaprabha Patil [India], Priyansh Nathani [India], Khushman Kaur Bhullar [India], Muhammed Elhadi [Libya], Maryam Khan [Pakistan], Nehal Rahim [Pakistan], Shweta Madhusudanan [UK], Joshua Erhabor [UK], Manasi Shirke [UK], Aishah Mughal [UK], Darica Au [UK], Mahan Salehi [UK], Sravani Royyuru [UK], Mohamed Ahmed [Egypt], Syeda Namayah Fatima Hussain [Pakistan], Daniel Robinson [UK], Anna Casey [UK], Mehdi Khan [UK], Alexandre Dukundane [Rwanda], Kwizera Festus [Rwanda], Vaishnavi Govind [Grenada], Rohan Pancharatnam [UK], Lorraine Ochieng [UK], Elliott H Taylor [UK], Hritik Nautiyal [UK], Marta de Andres Crespo [UK], Somy Charuvila [UK], and Alexandra Valetopoulou [UK]

### Research Capacity Building Committee:

Krithi Ravi [UK], Fatumata Jalloh [UK], Nermin Badwi [Egypt], Shahnur Shah [Kenya], Gul Kalra [India], Rohini Rajpal [India], Masooma Rana [Pakistan], Muskaan Abdul Qadir [Pakistan], Emmanuel Uwiringiyimana [Rwanda], Abdelrahman Azzam [Egypt], Mayara Fanelli [Brazil], Gustavo Mendonça Ataíde Gomes [Brazil], Igor Lima Buarque [Brazil], Isadora Schwaab Guerini [Brazil], Anfel Bouderbala [Algeria], Sarah Alfurais [Turkey], Mohamed Gamal [Egypt], Yara Hijazi [Palestine], Shatha Tailakh [Jordan], Hamza Al-Naggar [Yemen], Zain Douba [Syria], Sewar Elejla [Palestine], Abdullah Eldaly [Egypt], Ekram Sharashi [Libya], Ahmad Mansour [Palestine], Tamara Elyan [Palestine], Aouabed Nesrine [Algeria], Ammar Ayman [Egypt], Aya Zazo [Syria], Mohamed Bonna [Egypt], Safia Lorabi [Algeria], Hassan Alalami [Palestine], Rawan Yasser Emam [Egypt]

### Writing committee:

Soham Bandyopadhyay [UK], Rohini Dutta [India], Shweta Madhusudanan [UK], Suraj Gandhi [UK], Mehdi Khan [UK], Rhea Raj [UAE], Muath Alser [Egypt], Mohamad K. Abou Char [Jordan], Dennis Mazingi [Zimbabwe], Hira Zuberi [Pakistan], Iyad Sultan [Jordan], Dhruv Nath Ghosh [India], Nitin James Peters [India], Reto M Baertschiger [Canada], Augusto Zani [Canada], Noel Peter [UK], and Kokila Lakhoo [UK]

### Statistics committee:

Lucy Davies [UK] and Soham Bandyopadhyay [UK]

### Local teams:

#### Abubakar Tafawa Balewa University Teaching Hospital, Nigeria

Kefas John Bwala

AM Umar

Abdurahaman Aremu

Dauda E. Suleiman  
Tybat Aliyu  
**Aga Khan University Hospital, Pakistan**  
Ayesha Saleem  
Muhammad Arshad  
Kashaf Turk  
Sadaf Altaf  
**Ahmadu Bello University Teaching Hospital, Nigeria**  
Oluseyi Oyebode Ogunsua  
Tunde Talib Sholadoye  
Musliu Adetola Tolani  
Yakubu Alfa  
Keffi Mubarak Musa  
**AIC Kijabe Hospital, Kenya**  
Eric Mwangi Irungu  
Ken Muma  
Sarah Muma  
Mitchelle Obat  
**Ain Shams Hospitals "El-Demerdash", Egypt**  
Youssef Sameh Badran  
**Al-Basheer Hospital, Jordan**  
Abdulrahman Ghassan Qasem  
Faris Ayasra  
Reema Alnajjar  
**Al-Hussein University Hospital, Egypt**  
Mohamed Abdel-Maboud  
Abdelrahman Bahaa  
Ayat M. Saadeldin  
Mohamed Adwi  
Mahmoud Adly  
Abdallah Elshenawy  
**Alder Hey Children Hospital, UK**  
Amer Harky  
Leanne Gentle  
Kirstie Wright  
Jessica Luyt  
Olivia White  
Charlotte Smith  
Nathan Thompson  
Thomas Smith  
Imogen Harrison  
**Bangladesh Shishu Hospital & Institute, Bangladesh**  
Ashrarur Rahman Mitul  
Sabbir Karim  
Nazmul Islam  
**Benghazi pediatric hospital, Libya**  
Sara Kader Alsaeti  
Fatma Saleh Benkhial  
Mohammed Miftah Faraj Almihashhish  
Eman Salem Muftah Burzeiza

Hend Mohammed Masoud  
Mabroukah Saeid Alshamikh  
Raja Mari Mohammed Nasef  
Fatma Mohammed Masoud  
**Birmingham Children's Hospital, UK**

William B Lo  
Nyararai Togarepi  
Elaine Carrolan  
Benjamin Martin  
Max Pachl  
Benjamin J O'Sullivan  
**Borg El Arab University Hospital, Egypt**

Mohamed Hassanin  
Ahmed Saleh  
Mahmoud Bassiony  
Mostafa Qatora  
Mohamed Bahaeldin  
Shady Fadel  
Yasmine El Chazli  
**Centre Anti-Cancer, Batna, Algeria**

Anfel Bouderbala  
Kamel Hamizi  
Safia Lorabi  
Mehdi Anouar Zekkour  
Rima Rahmoun  
Boutheyna Drid  
Salma Naje Abu Teir  
**Centre hospitalier universitaire de Batna, Algeria**

Safia Lorabi  
Mohamed Yazid Kadir  
Yassine Zerizer  
Nacer Khernane  
Brahim Saada  
**Centre Hospitalo-Universitaire Ibn Sina de Rabat (CHIS), Morocco**

Imane Ammouze  
Yahya Elkaoune  
Hajar Moujtahid  
Ghita Chaoui  
Hajar Benaouda  
Meryem Gounni  
Narjiss Aji  
Laila Hessissen  
**Centro Hospitalar Universitário de São João, Portugal**

Joana Mafalda Monteiro  
Susana Nunes  
Maria do Bom-Sucesso  
**Children's Hospital of Wisconsin, United States of America**  
Dave R. Lal  
Brian T. Craig  
Kerri Beckett

**Chittagong Research Institute For Children Surgery, Bangladesh**

Tahmina Banu

Md Afruzul Alam

Orindom Shing Pulock

Tasmiah Tahera Aziz

**Clinic for Neurosurgery, Clinical Center of Serbia, Serbia**

Rosanda Ilic

Danica Grujicic

Tijana Nastasovic

Igor Lazic

Mihailo Milicevic

Vladimir Bascarevic

Radovan Mijalcic

Vuk Scepanovic

Aleksandar Stanimirovic

Aleksandra Paunovic

Ivan Bogdanovic

**Dhaka Medical College Hospital, Bangladesh**

Shahnoor Islam

AKM Amirul Morshed

A. K. M. Khairul Basher

Mehnaz Akter

S. M. Rezanur Rahman

Zannat Ara

Mohammed Tanvir Ahammed

Tania Akter

Kamrun Nahar

Fatema Sayed

Ashfaque Nabi

Md. Asif Iqbal

Md. Masud Rana

Md. Asaduzzaman

Md. Hasanuzzaman

**Dr. Lutfi Kirdar Kartal Training and Research Hospital, Turkey**

Kemal Tolga Saracoglu

Elif Akova

Evren Aydogmus

Bekir Can Kendirlioglu

Tufan Hicdonmez

**Dubai Hospital, United Arab Emirates**

Arshiya Adhnon

Asim Noor Rana

Hani Humad

Anjan Madasu

**El Safa Hospital, Egypt**

Ahmed Y Azzam

Mohammed A Azab

**El Sheikh Zayed Specialized Hospital, Egypt**

Sherief Ghozy

Alzhraa Salah Abbas

**Federal Medical Center, Abeokuta, Nigeria**

Olanrewaju Moses

**Federal Medical Center, Lokoja, Nigeria**

Ibiyeye Taiye Taibat

Taiwo Jones

Kalu Ukoha

Olagundoye Goke

Okorie Ikechukwu

**Federal Teaching Hospital Ido-Ekiti, Nigeria**

Abiodun Idowu Okunlola

**Frere Hospital, South Africa**

Milind Chitnis

Helga Nauhaus

Danelle Erwee

**Gloucestershire Hospitals NHS Foundation Trust, United Kingdom**

Robyn Brown

Agata Chylinska

Robin Simpson

Prasanna Gomes

Noel Peter

**GPACI - Grupo de Pesquisa e Assistência ao Câncer Infantil, Brazil**

Marco Aurelio Ciriaco Padilha

Elvercio Pereira de Oliveira Junior

Lucas Garschagen de Carvalho

Fabiola Leonelli Diz

**Helwan University Hospital, Egypt**

Mohamed El Kassas

Usama Eldaly

Ahmed Tawheed

Mohamed Abdelwahab

**Hôpital des Spécialités ONO, Morocco**

Oudrhiri Mohammed Yassaad

Bechri Hajar

El Ouahabi Abdessamad

Arkha Yasser

Hessissen Laila

**Ibn-Al-Atheer Teaching Hospital, Mosul, Iraq**

Farah Sameer Yahya (Department of Pediatrics, College of Medicine, University of Mosul, Mosul, Iraq)

Yasir Al-Agele

**Instituto Nacional de Enfermedades Neoplásicas, Peru**

Maria Teresa Peña Gallardo

Jacqueline Elizabeth Montoya Vásquez

Juan Luis García León

Sebastián Shu Yip

**John Radcliffe Hospital, United Kingdom**

Mariam Lami

Matthew H V Byrne

Duha Jasim

Harmit Ghattaura

Soham Bandyopadhyay

Kokila Lakhoo

**Johns Hopkins Hospital Bloomberg Children's Hospital, United States of America**

Eric W Etchill

Daniel Rhee

Stacy Cooper

Kevin Crow

Morgan Drucker

Megan Murphy

Benjamin Shou

Alan Siegel

**Kanuni Sultan Süleyman Research and Training Hospital, Turkey**

Yasin Kara

Gül Nihal Özdemir

**Kasr Al Ainy Hospital, Egypt**

Mahmoud Elfiky

Ehab El Refaee

**Khoula Hospital, Oman**

John George Massoud

**King Abdullah University Hospital, Jordan**

Ayah Bassam Ibrahim

Ruaa Bassam Ibrahim

Faris Abu Za'nouneh

Ranya M. Baddourah

Toqa Fahmawee

Ayah Al-Shraideh

**King Fahd Central Hospital, Saudi Arabia**

Ghazwani Salman

Ehab Alameer

Al-Mudeer Ali

Ghazwani Yahia

Khozairi Waleed

**King Hussein Cancer Center, Jordan**

Mohamad K. Abou Chaar

Iyad Sultan

Khalil Ghandour

Shaima' Al-Dabaibeh

Ammar Al-Basiti

Hazim Ababneh

Omaima El-Qurneh

**King Salman Armed Forces Hospital, Saudi Arabia**

Yousef Alalawi

Ahmad Al Ayed

Ehab Hanafy

Naif Al Bolowi

**KK Women's and Children's Hospital, Singapore**

Amos HP Loh

Anette S Jacobsen

Heidi Barola

Aubrey L Pagaduan

Jingdan Fan

**Lagos University Teaching Hospital, Nigeria**

Olumide Abiodun Elebute

Adesoji O. Ademuyiwa

Christopher O. Bode

Justina O. Seyi-Olajide

Oluwaseun Ladipo-Ajayi

Felix M. Alakaloko

George C. Ihediwa

Kareem O. Musa

Edamisan O. Temiye

Olufemi Oni

Adeseye M. Akinsete

**Lahore General Hospital, Pakistan**

Janita Zarrish

Ramsha Saleem

Soha Zahid

Atiqa Amirali

Ahsan Nadeem

Sameer Saleem Tebha

Zonaira Qayyum

Sana Tahir

Anneqa Tahir

Rabbey Raza Khan

Ayesha Mehmood

**Liaquat National Hospital and Medical College, Pakistan**

Muhammad Arshad

Taimur Iftikhar Qureshi

Pooja Kumari

**Mater Dei Hospital, Sir Anthony Mamo Oncology Centre, Malta**

Victor Calvagna

Nathalie Galea

Ariana Axiaq

**Mayo Clinic, United States of America**

Matthew R Schuelke

Jake A. Kloebe

Robert L. Owen

Alexander S. Roth

Catherine Yang

J. Hudson Barnett

Lucien P. Jay

Kirk David Wyatt

Paul J. Galardy

**Medical University of Pecs, Department of Paediatrics, Hungary**

Agnes Vojcek

**Menoufia University Hospital, Egypt**

Mahmoud Maher Abdelnaby Alrahawy

Seham M Ragab

Abdallah R Allam

Eman Ibrahim Hager

Abdelrahman Azzam

Ammar Ayman

**Ministry of Health Marmara University Pendik Research and Application Hospital,  
Turkey**

Kıvılcım Karadeniz Cerit

Adnan Dağçınar

Tümay Umuroğlu

Ayten Saraçoğlu

Mustafa Sakar

Can Kıvrak

Gül Çakmak

**MISR Cancer Centre, Egypt**

Ibrahim Sallam

Gamal Amira

Mohamed Sherief

Ahmed Sherif

**National Cancer Institute, Brazil**

Simone de Oliveira Coelho

Arissa Ikeda

Licia Portela

Marianne Monteiro Garrigo

Ricardo Vianna de Carvalho

Fernanda Lobo

Sima Ester Ferman

Fernanda Ferreira da Silva Lima

**National Cancer Institute, Sudan**

Moawia Mohammed Ali Elhassan

Nada Osman Yousif Elhaj

Hytham K. S. Hamid

**National Hospital, Nigeria**

Emmanuel A. Ameh

Vincent E. Nwatah

Adewumi B. Oyesakin

**Nnamdi Azikiwe University Teaching Hospital, Nigeria**

Andrew Nwankwo Osuigwe

Okechukwu Hyginus Ekwunife

Chisom Adaobi Nri-Ezedi

Eric Okechukwu Umeh

**Ola Daring Children's Hospital, Sierra Leone**

Nellie Patiala

**Olabisi Onabanjo University Teaching Hospital, Nigeria**

Ibukunolu Olufemi Ogundele

Abiodun Folashade Adekanmbi

Olubunmi Motunrayo Fatungase

Olubunmi Obafemi Obadaini

**Ondokuz Mayıs Üniversitesi, Turkey**

Sarah Al-Furais

Humaida Hemlae

Sreylis Nay

**Pantai Jerudong Specialist Centre, Brunei**



John Mathew

R M Jeffri Ismail

**Pediatric Oncology Institute – GRAACC, Brazil**

Simone de Campos Vieira Abib

Fabianne Altruda de Moraes Costa Carlesse

Mayara Caroline Amorim Fanelli

Fernanda Kelly Marques de Souza

**Policlinico Umberto I, Sapienza University of Rome, Italy**

Pierfrancesco Lapolla

Andrea Mingoli

Denis Cozzi

Anna Maria Testi

Paolo Musiu

Paolo Sapienza

Gioia Brachini

Martina Zambon

Simona Meneghini

Pierfranco Cicerchia

Bruno Cirillo

**Prince Mohammed bin Nasser Hospital, Jazan, Saudi Arabia**

Ghazwani Salman

**Raparin Pediatric Teaching Hospital, Iraq**

Abdulrahman Omar Taha

**Saadna Mohamed Abdenour, Algeria**

Aouabed Nesrine

Bouaoud Souad

Mebarki Malika

Bioud Belkacem

**Sabha Medical Centre, Libya**

Ayman Meelad

Hajier Salim Alrashed

**Salmaniya Medical Complex, Bahrain**

Fayza Haider

Fatema Naser Al Fayezi

**Shahid Baghaei Hospital, Iran**

Fakher Rahim

**Tamale Teaching Hospital, Ghana**

Alhassan Abdul-Mumin

Halwani Yaninga Fuseini

Peter Gyamfi Kwarteng

Abubakari Bawa Abdulai

Sheba Mary Pognaa Kunfah

Gilbert B. Bonsaana

Stephanie Ajinkpang

Edmund M. Der

Francis A. Abantanga

Mary Joan Kpiniong

Kingsley Aseye Hattor

Kingsley Appiah Bimpong

**Tanta University Hospital, Egypt**

Mohamed Elbahnasawy  
Sherief Abdelsalam  
Ahmed Samir

**The Hospital for Sick Children, Canada**

Reto M. Baertschiger  
Amanpreet Brar  
Andreea C, Matei  
Augusto Zani

**The Indus Hospital, Pakistan**

Lubna Samad  
Hira Khalid Zuberi  
Kishwer Nadeem  
Naema Khayyam  
Fatima Ambreen Imran  
Nida Zia  
Sadia Muhammad  
Muhammad Rafie Raza  
Muhammad Rahil Khan

**Tishreen University Hospital, Syria**

Alaa Hamdan  
Abdeljawad Mazloun  
Ali Abodest  
Nisreen Ali  
Bardisan Gawarieh  
Ammar Omran  
Almed Moussa  
Alaa Ahmed  
Munawar Hraib  
Victor Khoury  
Abdulrahman Almjersah  
Mohammad Ali Deeb  
Almahmod Alkhalil  
Akram Ahmed  
Mohammad Ahmad  
Ali Alelayan  
Ali Hammed  
Wassem Shater

**Tobruk Medical Centre, Libya**

Ahmad Bouhuwaish  
Alqasim Abdulkarim

**Tripoli University Hospital, Libya**

Eman Abdulwahed  
Marwa Biala  
Reem Ghamgh  
Amani Alamre  
Marwa Shelft  
Asmaa A. M. Albanna  
Hoda Tawel

**Unit of Paediatric and Adolescent Haematology and Oncology, 2nd Department of Paediatrics, Aristotle University of Thessaloniki, University General Hospital AHEPA, Greece**

Emmanuel Hatzipantelis

Athanasios Tragiannidis

Eleni Tsotridou

Assimina Galli-Tsinopoulou

**Universiti Kebangsaan Malaysia Medical Centre, Malaysia**

Dayang Anita Abdul Aziz

Zarina Abdul Latiff

Hamidah Alias

C-Khai Loh

Doris Lau

Azrina Syarizad Khutubul Zaman

**University Children's Hospital of Basel, Switzerland**

Raphael N. Vuille-dit-Bille

Stefan G. Holland-Cunz

Nima Allafi

**University College Hospital (UCH), Nigeria**

Taiwo Akeem Lawal

Kelvin Ifeanyichukwu Egbuchulem

Olakayode Olaolu Ogundoyin

Isaac Dare Olulana

Biobele J. Brown

Oluwasegun Joshua Afolaranmi

AbdulBasit Fehintola

**University Hospital Hamburg-Eppendorf, Germany**

Annika Heuer

Christine Nitschke

Michael Boettcher

Matthias Priemel

Lennart Viezens

Martin Stangenberg

Marc Dreimann

Alonja Reiter

Jasmin Meyer

Leon Köpke

Karl-Heinz Frosch

**University of Abuja Teaching Hospital, Nigeria**

Samson Olori

Uduak Offiong

Philip Mari Mshelbwala

Fashie Andrew Patrick

Aminu Muhammed Umar

Otene ThankGod N.

**University of Ilorin Teaching Hospital, Nigeria**

Abdulrasheed A Nasir

Kazeem O. O. Ibrahim

Dupe S. Ademola-Popoola

Olayinka T. Sayomi

Alege Abdurrzzaq  
Ademola A. Adeyeye  
Khadijah O. Omokanye  
Lukman O Abdur-Rahman  
Olubisi Olutosin Bamidele  
Shakirullah AbdulAzeez  
Aminat Akinoso  
Michael O. Adegboye  
**University of Malaya Medical Centre, Malaysia**  
Shireen Anne Nah  
Yuki Julius Ng  
Syukri Ahmad Zubaidi  
**University of Texas Medical Branch, United States of America**  
Murad Almasri  
Sara Ali  
Rasaq Olaosebikan  
Akila Muthukumar  
**University Teaching Hospital, Zambia**  
Patricia Shinondo  
Amon Ngongola  
Bruce Bvulani  
Azad Patel  
**Usman Danfodiyo University Teaching Hospital, Nigeria**  
Abdullahi Nuhu-Koko  
Baba Jibrin  
Ajiboye L. Olalekan  
Christopher S. Lukong  
Ezekiel I. Ajayi  
**Vall d'Hebron University Hospital, Spain**  
Gabriela Guillén  
Sergio López  
José Andrés Molino  
Pablo Velasco  
**Wingat Royal Hospital, Egypt**  
Omar Elmandouh  
Omar Hamam  
Rim Elmandouh  
**Yale New Haven Hospital, United States of America**  
Nensi Melissa Ruzgar  
Rachel Levinson  
Shashwat Kala  
Sarah Ullrich  
Emily Christison-Lagay  
**Zagazig University Hospital, Egypt**  
Aya Sabry Mortada  
Mahmoud Ahmed Ebada  
Eman Seif Alnaser Solimam  
Khaled Abualkher  
Amr Mohammed Elsayed Yousf  
Mohamed Mohamed Holail

Reem Mohamed Almowafy

**National/Regional Leads:**

Algeria: Salah Eddine Oussama Kacimi  
Bahrain: Fayza Haider  
Bangladesh: Tahmina Banu, Ashrarur Rahman Mitul  
Brazil: Simone de Campos Vieira Abib  
Brunei: Janice Hui Ling Wong  
Canada: Reto Baertschiger  
Egypt: Essam Elhalaby, Muath Alser, Mahmoud M. Saad  
Germany: Guido Seitz, Judith Lindbert  
Ghana: Francis Abantanga  
Greece: Georgios Tsoulfas, Asimina Galli-Tsinopoulou  
Hungary: Agnes Vojcek  
Iran: Maryam Ghavami Adel  
Iraq: Abdulrahman Omar Taha  
Italy: Calogero Virgone, Francesco Pata, Gaetano Gallo  
Jordan: Mohammad K. Abou Chaar, Faris Ayasra  
Kenya: Eric Mwangi Irungu  
Libya: Muhammed Elhadi  
Malaysia: Shireen Anne Nah, Dayang Anita Abdul Aziz  
Malta: Victor Calvagna  
Morocco: Outani Oumaima, Zineb Bentounsi  
Nigeria: Adesoji Ademuyiwa  
Oman: Dhruv Nath Ghosh  
Pakistan: Muhammad Arshad, Lubna Samad  
Peru: Lily Saldana  
Portugal: Jan Godzinsky  
Saudi Arabia: Abdelbasit Ali, Ehab Alameer  
Serbia: Dragana Janic  
Sierra Leone: Mohamed Bella Jalloh, Nellie Bell  
Singapore: Annette Jacobsen, Chan Hon Chui  
South Africa: Milind Chitnis  
Spain: Israel Fernandez Pineda, Lucas Krauel, Maricarmen Olivos  
Sudan: Waha Rahama, Hazim Elfatih  
Switzerland: Raphael N. Vuille-dit-Bille  
Syria: Alaa Hamdan  
Turkey: Arda Isik  
United Arab Emirates: Asim Noor Rana  
United Kingdom: Kokila Lakhoo, Kate Cross, Max Pacht  
United States of America: Andrea Hayes-Jordan, Roshni Dasgupta  
Zambia: Patricia Shinondo, Amon Ngongola  
Middle-East and North Africa: Mohamedraed Elshami
