# Supplementary material
Source: HighWire-hosted journal article supplement (https://bmjopen.bmj.com/content/12/4/e054690)

Tanta University  
Faculty of Medicine  
Research Ethics Committee  
Federal Wide Assurance ( FWA)  
FWA00022834  
IRB0010038

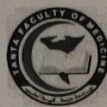

جامعة طنطا  
كلية الطب  
لجنة أخلاقيات البحث العلمي

## Research Ethics Committee Review Report

Approval Code: 33965/7/20

Name of the PI: محمد جمال البهنساوي

Position : مدرس

Name of the Department: طب الطوارئ و الاصابات

Type of the research: MSc ☐ MD ☐ Promotion research ☒

Project ☐

Paediatric tumour during the COVID-19 pandemic: an international, multicentre, observational cohort study

اورام الاطفال أثناء جائحة الكورونا المستجد: دراسة ملاحظة.جمعية من عدة مراكز دولية

Approved ☒ Disapproved ☐ Approved after modification ☒

This Research proposal conforms to the accepted ethical standard

Date: 19/7/2020

Chief of Ethics committee

Prof. Mona El-Gohary

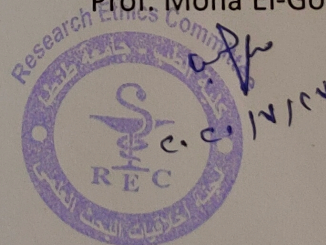

Supplement: inline-supplementary-material-5 [file inline-supplementary-material-5.pdf]
