# Supplementary material
Source: HighWire-hosted journal article supplement (https://bmjopen.bmj.com/content/12/4/e054690)
Supplement: inline-supplementary-material-8 [file inline-supplementary-material-8.pdf]

**Appendix S8 – Baseline Characteristics of low-and-middle-income countries sub-divided into low and middle income countries.**

| Variable                                                                                   |                                                                              | Low-income countries<br>(N=36)<br>N (%) | Lower-middle income countries<br>(N=520)<br>N (%) | Upper-middle income countries<br>(N=548)<br>N (%) |
|--------------------------------------------------------------------------------------------|------------------------------------------------------------------------------|-----------------------------------------|---------------------------------------------------|---------------------------------------------------|
| <b>Age (years), median (range)</b>                                                         |                                                                              | 5.0 (3.5, 9)                            | 5.0 (2, 10)                                       | 5.0 (3, 10)                                       |
| <b>Sex</b>                                                                                 | Female                                                                       | 16 (44.4)                               | 226 (43.5%)                                       | 227 (41.4)                                        |
|                                                                                            | Male                                                                         | 20 (55.6)                               | 290 (55.8%)                                       | 321 (58.6)                                        |
|                                                                                            | Missing                                                                      | 0 (0.0)                                 | 4 (0.8%)                                          | 0 (0.0)                                           |
| <b>Weight (kg), median (range)</b>                                                         |                                                                              | -                                       | 19 (14, 31)                                       | 18 (13, 27)                                       |
| <b>ASA grade</b>                                                                           | 1 - a normal healthy patient                                                 | 24 (66.7)                               | 158 (30.4)                                        | 162 (29.6)                                        |
|                                                                                            | 2 - a patient with mild systemic disease                                     | 1 (2.8)                                 | 316 (60.8)                                        | 106 (19.3)                                        |
|                                                                                            | 3 - a patient with severe systemic disease                                   | 0 (0.0)                                 | 28 (5.4)                                          | 121 (22.1)                                        |
|                                                                                            | 4 - a patient with severe systemic disease that is a constant threat to life | 0 (0.0)                                 | 9 (1.7)                                           | 25 (4.6)                                          |
|                                                                                            | 5 - a moribund patient who is not expected to survive without the operation  | 0 (0.0)                                 | 5 (1.0)                                           | 3 (0.5)                                           |
|                                                                                            | Missing                                                                      | 11 (30.6)                               | 4 (0.8)                                           | 131 (23.9)                                        |
| <b>Tumour Type</b>                                                                         | Non-Hodgkin lymphoma                                                         | 6 (16.7)                                | 46 (8.9)                                          | 37 (6.8)                                          |
|                                                                                            | Acute lymphoblastic leukaemia                                                | 10 (27.8)                               | 192 (36.9)                                        | 178 (32.5)                                        |
|                                                                                            | Ewing sarcoma                                                                | 5 (13.9)                                | 19 (3.7)                                          | 8 (40.7)                                          |
|                                                                                            | Glioma                                                                       | 0 (0.0)                                 | 21 (4.0)                                          | 52 (50.2)                                         |
|                                                                                            | Hodgkin lymphoma                                                             | 5 (13.9)                                | 19 (3.7)                                          | 39 (57.3)                                         |
|                                                                                            | Medulloblastoma                                                              | 1 (2.8)                                 | 36 (6.9)                                          | 20 (61.0)                                         |
|                                                                                            | Neuroblastoma                                                                | 3 (8.3)                                 | 43 (8.3)                                          | 34 (67.2)                                         |
|                                                                                            | Osteosarcoma                                                                 | 2 (5.6)                                 | 29 (5.6)                                          | 14 (69.7)                                         |
|                                                                                            | Retinoblastoma                                                               | 0 (0.0)                                 | 39 (7.5)                                          | 48 (78.5)                                         |
|                                                                                            | Rhabdomyosarcoma                                                             | 0 (0.0)                                 | 22 (4.2)                                          | 39 (7.1)                                          |
|                                                                                            | Wilms Tumour                                                                 | 4 (11.1)                                | 54 (10.3)                                         | 79 (14.4)                                         |
| <b>Was patient tested for covid within 30 days from their first anti-cancer treatment?</b> | No                                                                           | 32 (91.4)                               | 242 (46.5)                                        | 355 (64.8)                                        |
|                                                                                            | Symptomatic screening only                                                   | 3 (8.6)                                 | 113 (21.7)                                        | 69 (12.6)                                         |
|                                                                                            | Yes – by CT Thorax                                                           | 0 (0.0)                                 | 6 (1.2)                                           | 1 (0.2)                                           |
|                                                                                            | Yes – by laboratory test                                                     | 0 (0.0)                                 | 113 (21.7)                                        | 49 (8.9)                                          |
|                                                                                            | Not applicable (No anti-cancer treatment given post March 11th 2020)         | 0 (0.0)                                 | 8 (1.5)                                           | 5 (0.9)                                           |
|                                                                                            | Missing                                                                      | 0 (0.0)                                 | 38 (0.7)                                          | 68 (12.4)                                         |

---

|                                          |                                                                                  |           |            |            |
|------------------------------------------|----------------------------------------------------------------------------------|-----------|------------|------------|
| <b>Was patient diagnosed with covid?</b> | No                                                                               | 10 (28.6) | 452 (86.9) | 452 (82.5) |
|                                          | Not applicable (no anti-cancer treatment given post March 11 <sup>th</sup> 2020) | 0 (0.0)   | 7 (1.3)    | 7 (1.3)    |
|                                          | Proven with laboratory test or CT Thorax                                         | 0 (0.0)   | 21 (4.0)   | 21 (3.8)   |
|                                          | Probable - clinically suspected                                                  | 0 (0.0)   | 5 (1.0)    | 5 (0.9)    |
|                                          | Unknown                                                                          | 25 (71.4) | 8 (1.5)    | 8 (1.5)    |
|                                          | Missing                                                                          | 0 (0.0)   | 27 (5.2)   | 55 (10.0)  |

---
